# Supplementary material for: A MADS-Box Gene CiMADS43 Is Involved in Citrus Flowering and Leaf Development through Interaction with CiAGL9
Source: Int J Mol Sci. 2021 May 14;22(10):5205. doi: 10.3390/ijms22105205 (PMC8156179; doi:10.3390/ijms22105205)
Supplement: Supplementary file 1 [file ijms-22-05205-s001.zip › Supporting Information Figures S1-S3.pdf]

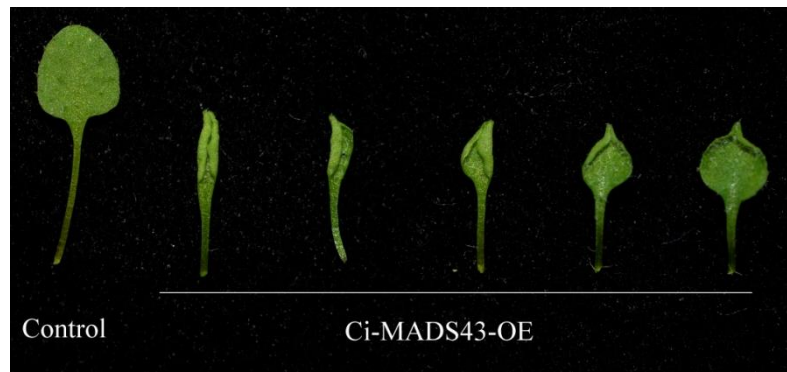

**Figure S1.** The rosette leaves of *CiMADS43* transgenic *Arabidopsis* with varying degrees of curling.

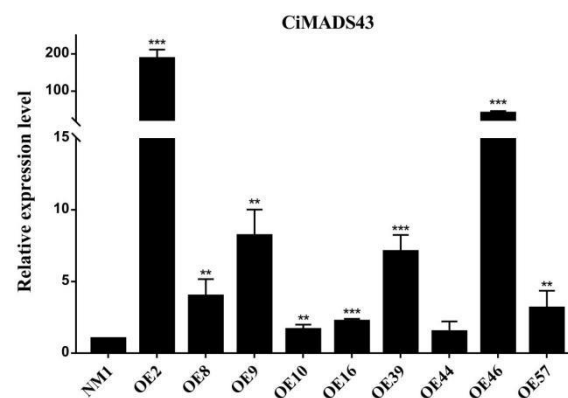

**Figure S2.** Expression analysis of *CiMADS43* gene in overexpressed transgenic lemons and wild type (WT) .

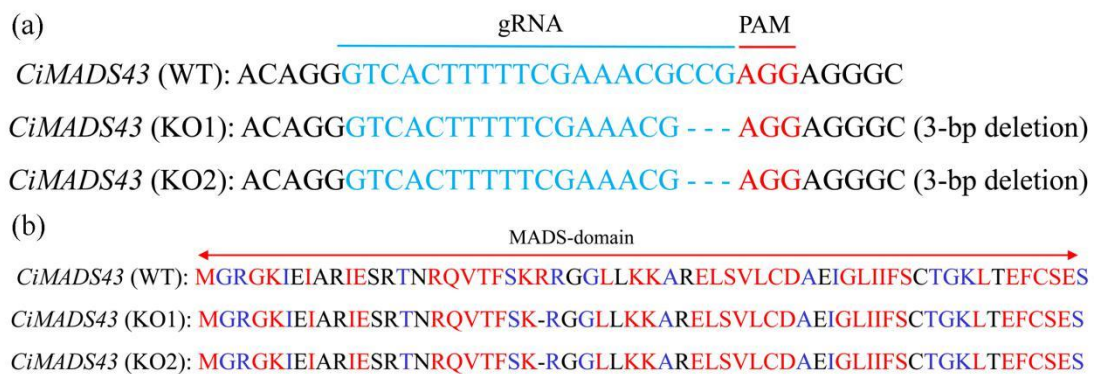

**Figure S3.** *CiMADS43* gene and protein sequences of wild-type and mutation types at target sites. (a) *CiMADS43* gene sequences at target sites. Blue, 20 bp gRNA target sites. red, PAM region. Dashes, deletions. (b) *CiMADS43* protein sequences of MADS-domain. Red, High consensus. Blue, Low consensus. Dashes, deletions.
