# Supplementary material for: A MADS-Box Gene CiMADS43 Is Involved in Citrus Flowering and Leaf Development through Interaction with CiAGL9
Source: Int J Mol Sci. 2021 May 14;22(10):5205. doi: 10.3390/ijms22105205 (PMC8156179; doi:10.3390/ijms22105205)
Supplement: Supplementary file 1 [file ijms-22-05205-s001.zip › Supporting Information Tables S1-S4.xls]

## Sheet: Table S1
Table S1 Proteins used for phylogenetic analysis
Protein name	Species	GenBank accession number
CiMADS43	Citrus sinensis	XP_006468501.1
CiTT16	Citrus sinensis	XP_006484520.1
AtTT16/ABS	Arabidopsis thaliana	NP_001330404.1
AtGOA	Arabidopsis thaliana	NP_174399.2
AtAP3	Arabidopsis thaliana	NP_191002.1
AtAG	Arabidopsis thaliana	P17839.2
AtSEP3	Arabidopsis thaliana	AEE30503.1
AmDEFH21	Antirrhinum majus	CAC85225
GgGGM2	Gnetum gnemon	CAB44448.1
GgGGM13	Gnetum gnemon	CAB44459
OsMADS29	Oryza sativa	Q6H711
OsMADS30	Oryza sativa	AAO39706
PhFBP7	Petunia hybrida	CAA57311.1
PhFBP11	Petunia hybrida	CAA57445.1
PhFBP24	Petunia hybrida	Q9ATE5.1
PhAGL9	Petunia hybrida	Q03489.2
PhMADS3	Petunia hybrida	CAA51417.1
PvDEFHL21	Pistacia vera	XP_031278613.1
PgFBP24	Punica granatum	XP_031400121.1
SoFBPL24	Syzygium oleosum	XP_030467505.1
VrFBPL24	Vitis riparia	XP_034698718.1
VvBS1	Vitis vinifera	CBI27190.3
VvFBP24	Vitis vinifera	XP_010648959.1
ZmZMM17	Zea mays	CAC81053
CiAGL9	Citrus sinensis	NP_001306995.1
AtAGL9	Arabidopsis thaliana	AAC00586.1
BnAGL9	Brassica napus	XP_022545908.1
BrAGL9	Brassica rapa	XP_009113783.2
CpAGL9	Carica papaya	XP_021899724.1
GmAGL9	Glycine max	NP_001242742.2
GrAGL9	Gossypium raimondii	KJB30869.1
MdAGL9	Malus domestica	XP_028952174.1
PpAGL9	Prunus persica	XP_007223808.1
PtAGL9	Populus trichocarpa	XP_024453001.1
RsAGL9	Raphanus sativus	XP_018449309.1
VvAGL9	Vitis vinifera	NP_001268114.1

## Sheet: Table S2
Table S2 The proteins obtained by Y2H screening
GenBank accession	Description
LOC18045570	Citrus clementina agamous-like MADS-box protein AGL9 homolog, transcript variant X1, mRNA
LOC102622673	Citrus sinensis 26S proteasome regulatory subunit 4 homolog A , mRNA
LOC18037447	Citrus clementina DNA mismatch repair protein MLH3 , transcript variant X5, mRNA
LOC102622811	Citrus sinensis glucan endo-1,3-beta-glucosidase 3 , transcript variant X3, mRNA
LOC112100248	Citrus clementina uncharacterized , ncRNA
LOC18048326	Citrus clementina PP2A regulatory subunit TAP46 , mRNA
LOC102611556	Citrus sinensis UDP-N-acetylglucosamine transferase subunit ALG13 homolog ,transcript variant X2, mRNA
LOC102607829	Citrus sinensis 26S proteasome non-ATPase regulatory subunit 11 homolog , mRNA
LOC102613471	Citrus sinensis zinc finger CCCH domain-containing protein 53 , mRNA
LOC18048993	Citrus clementina heavy metal-associated isoprenylated plant protein 36
LOC18046741	Citrus clementina phospholipase A2-alpha , mRNA
LOC102622887	Citrus sinensis glycine-rich protein A3 , transcript variant X3, mRNA
LOC102618414	Citrus sinensis ribonuclease P protein subunit p25-like protein , mRNA
LOC18034865	Citrus clementina V-type proton ATPase 16 kDa proteolipid subunit, mRNA
LOC102625059	Citrus sinensis ubiquitin-conjugating enzyme E2-17 kDa , transcript variant X1, mRNA

## Sheet: Table S3
Table S3 Analysis of CiMADS43 promoter sequences
Site Name	Sequence	Position	Strand	Organism	Function
MYB-like sequence	TAACCA	-1020	-	Arabidopsis thaliana
STRE	AGGGG	-1968	+	Arabidopsis thaliana
Myb-binding site	CAACAG	-624	+	Nicotiana tabacum
CCGTCC motif	CCGTCC	-1852	+	Nicotiana tabacum
as-1	TGACG	-1595	-	Arabidopsis thaliana
TATA-box	ATATAT	-1938	+	Brassica napus	core promoter element around -30 of transcription start
TATA-box	TATA	-1937	+	Arabidopsis thaliana	core promoter element around -30 of transcription start
TATA-box	TATAAATA	-1912	-	Daucus carota	core promoter element around -30 of transcription start
TATA-box	TATAAAT	-1911	-	Brassica juncea	core promoter element around -30 of transcription start
TATA-box	TATAAA	-1910	-	Helianthus annuus	core promoter element around -30 of transcription start
TATA-box	TATAA	-1909	-	Arabidopsis thaliana	core promoter element around -30 of transcription start
TATA-box	TATA	-1908	+	Arabidopsis thaliana	core promoter element around -30 of transcription start
TATA-box	TATA	-1643	+	Arabidopsis thaliana	core promoter element around -30 of transcription start
TATA-box	TATA	-1621	+	Arabidopsis thaliana	core promoter element around -30 of transcription start
TATA-box	TATATA	-1196	+	Arabidopsis thaliana	core promoter element around -30 of transcription start
TATA-box	ATATAT	-1195	+	Brassica napus	core promoter element around -30 of transcription start
TATA-box	TATATA	-1194	+	Arabidopsis thaliana	core promoter element around -30 of transcription start
TATA-box	ATATAA	-1193	+	Brassica oleracea	core promoter element around -30 of transcription start
TATA-box	TATA	-1192	+	Arabidopsis thaliana	core promoter element around -30 of transcription start
TATA-box	ATTATA	-931	+	Brassica napus	core promoter element around -30 of transcription start
TATA-box	TATAA	-930	-	Arabidopsis thaliana	core promoter element around -30 of transcription start
TATA-box	TATA	-929	-	Arabidopsis thaliana	core promoter element around -30 of transcription start
TATA-box	TATACA	-877	-	Helianthus annuus	core promoter element around -30 of transcription start
TATA-box	TATATA	-875	-	Arabidopsis thaliana	core promoter element around -30 of transcription start
TATA-box	ATATAA	-874	+	Brassica oleracea	core promoter element around -30 of transcription start
TATA-box	TATA	-873	-	Arabidopsis thaliana	core promoter element around -30 of transcription start
TATA-box	ATATAT	-868	-	Brassica napus	core promoter element around -30 of transcription start
TATA-box	TATATA	-867	-	Arabidopsis thaliana	core promoter element around -30 of transcription start
TATA-box	ATATAT	-866	-	Brassica napus	core promoter element around -30 of transcription start
TATA-box	TATA	-865	-	Arabidopsis thaliana	core promoter element around -30 of transcription start
TATA-box	TACATAAA	-804	-	Oryza sativa	core promoter element around -30 of transcription start
TATA-box	TATA	-485	-	Arabidopsis thaliana	core promoter element around -30 of transcription start
TATA-box	TATACA	-471	-	Helianthus annuus	core promoter element around -30 of transcription start
TATA-box	TATATA	-469	-	Arabidopsis thaliana	core promoter element around -30 of transcription start
TATA-box	TATA	-467	-	Arabidopsis thaliana	core promoter element around -30 of transcription start
TATA-box	TATATA	-370	-	Arabidopsis thaliana	core promoter element around -30 of transcription start
TATA-box	ATATAT	-369	-	Brassica napus	core promoter element around -30 of transcription start
TATA-box	TATATA	-368	-	Arabidopsis thaliana	core promoter element around -30 of transcription start
TATA-box	ATATAT	-367	-	Brassica napus	core promoter element around -30 of transcription start
TATA-box	TATA	-366	-	Arabidopsis thaliana	core promoter element around -30 of transcription start
TATA-box	ATATAT	-127	-	Brassica napus	core promoter element around -30 of transcription start
TATA-box	TATA	-126	-	Arabidopsis thaliana	core promoter element around -30 of transcription start
TATA-box	ATTATA	-78	+	Brassica napus	core promoter element around -30 of transcription start
TATA-box	TATAA	-77	-	Arabidopsis thaliana	core promoter element around -30 of transcription start
TATA-box	TATA	-76	-	Arabidopsis thaliana	core promoter element around -30 of transcription start
TATA-box	TATA	-66	-	Arabidopsis thaliana	core promoter element around -30 of transcription start
TATA-box	TATAAA	-28	-	Helianthus annuus	core promoter element around -30 of transcription start
TATA-box	TATAA	-27	-	Arabidopsis thaliana	core promoter element around -30 of transcription start
TATA-box	TATA	-26	-	Arabidopsis thaliana	core promoter element around -30 of transcription start
TATA-box	TATA	-8	-	Arabidopsis thaliana	core promoter element around -30 of transcription start
CAAT-box	CAAT	-1922	-	Nicotiana glutinosa
CAAT-box	CAAT	-1884	+	Nicotiana glutinosa
CAAT-box	CAAT	-1780	-	Nicotiana glutinosa
CAAT-box	CAAT	-1757	-	Nicotiana glutinosa
CAAT-box	CAAAT	-1714	-	Pisum sativum	common cis-acting element in promoter and enhancer regions
CAAT-box	CAAAT	-1591	-	Pisum sativum	common cis-acting element in promoter and enhancer regions
CAAT-box	CAAT	-1467	-	Nicotiana glutinosa
CAAT-box	CAAT	-1455	-	Nicotiana glutinosa
CAAT-box	CAAT	-1348	-	Nicotiana glutinosa
CAAT-box	CAAT	-1341	+	Nicotiana glutinosa
CAAT-box	CAAT	-1339	-	Nicotiana glutinosa
CAAT-box	CAAT	-1307	+	Nicotiana glutinosa
CAAT-box	CAAAT	-1105	-	Pisum sativum	common cis-acting element in promoter and enhancer regions
CAAT-box	CAAT	-1096	+	Nicotiana glutinosa
CAAT-box	CAAT	-837	+	Nicotiana glutinosa
CAAT-box	CAAT	-816	+	Nicotiana glutinosa
CAAT-box	CAAT	-756	+	Nicotiana glutinosa
CAAT-box	CAAT	-726	-	Nicotiana glutinosa
CAAT-box	CAAT	-699	-	Nicotiana glutinosa
CAAT-box	CAAT	-628	+	Nicotiana glutinosa
CAAT-box	CAAT	-604	+	Nicotiana glutinosa
CAAT-box	CAAAT	-602	-	Pisum sativum	common cis-acting element in promoter and enhancer regions
CAAT-box	CAAAT	-556	-	Pisum sativum	common cis-acting element in promoter and enhancer regions
CAAT-box	CAAAT	-345	+	Pisum sativum	common cis-acting element in promoter and enhancer regions
CAAT-box	CCAAT	-338	+	Arabidopsis thaliana	common cis-acting element in promoter and enhancer regions
CAAT-box	CAAT	-337	+	Nicotiana glutinosa
CAAT-box	CAAT	-268	+	Nicotiana glutinosa
CAAT-box	CAAT	-228	+	Nicotiana glutinosa
CAAT-box	CAAAT	-88	-	Pisum sativum	common cis-acting element in promoter and enhancer regions
CAAT-box	CAAT	-16	-	Nicotiana glutinosa
MYB	CAACCA	-1167	+	Arabidopsis thaliana
MYB	TAACCA	-1020	-	Arabidopsis thaliana
MYB	CAACAG	-624	+	Arabidopsis thaliana
GT1-motif	GGTTAA	-1330	+	Arabidopsis thaliana	light responsive element
Myb	TAACTG	-1693	+	Arabidopsis thaliana
A-box	CCGTCC	-1852	+	Petroselinum crispum	cis-acting regulatory element
Unnamed__4	CTCC	-1610	+	Petroselinum hortense
Unnamed__4	CTCC	-1607	+	Petroselinum hortense
Unnamed__4	CTCC	-1522	+	Petroselinum hortense
Unnamed__4	CTCC	-1428	+	Petroselinum hortense
Unnamed__4	CTCC	-1071	+	Petroselinum hortense
Unnamed__4	CTCC	-236	+	Petroselinum hortense
ARE	AAACCA	-1401	-	Zea mays	cis-acting regulatory element essential for the anaerobic induction
ARE	AAACCA	-751	+	Zea mays	cis-acting regulatory element essential for the anaerobic induction
ARE	AAACCA	-309	+	Zea mays	cis-acting regulatory element essential for the anaerobic induction
ARE	AAACCA	-282	-	Zea mays	cis-acting regulatory element essential for the anaerobic induction
ARE	AAACCA	-134	+	Zea mays	cis-acting regulatory element essential for the anaerobic induction
MYC	CATGTG	-1736	+	Arabidopsis thaliana
MYC	CATTTG	-1592	+	Arabidopsis thaliana
MYC	CAATTG	-1341	+	Arabidopsis thaliana
MYC	CATTTG	-1106	+	Arabidopsis thaliana
MYC	CATGTG	-572	+	Arabidopsis thaliana
MYC	CATTTG	-557	+	Arabidopsis thaliana
MYC	CATGTG	-540	-	Arabidopsis thaliana
MYC	CATGTG	-463	+	Arabidopsis thaliana
AAGAA-motif	GAAAGAA	-321	+	Avena sativa
AAGAA-motif	GAAAGAA	-278	-	Avena sativa
TCA-element	CCATCTTTTT	-421	-	Nicotiana tabacum	cis-acting element involved in salicylic acid responsiveness
TCA-element	TCAGAAGAGG	-176	-	Brassica oleracea	cis-acting element involved in salicylic acid responsiveness
CCGTCC-box	CCGTCC	-1852	+	Petroselinum hortense
W box	TTGACC	-1377	+	Arabidopsis thaliana
TCA	TCATCTTCAT	-1494	-	Pisum sativum
TGACG-motif	TGACG	-1595	-	Hordeum vulgare	cis-acting regulatory element involved in the MeJA-responsiveness
AE-box	AGAAACTT	-1181	+	Arabidopsis thaliana	part of a module for light response
AT~TATA-box	TATATA	-1196	+	Arabidopsis thaliana
AT~TATA-box	TATATA	-1194	+	Arabidopsis thaliana
AT~TATA-box	TATATA	-875	-	Arabidopsis thaliana
AT~TATA-box	TATATA	-867	-	Arabidopsis thaliana
AT~TATA-box	TATATA	-469	-	Arabidopsis thaliana
AT~TATA-box	TATATA	-370	-	Arabidopsis thaliana
AT~TATA-box	TATATA	-368	-	Arabidopsis thaliana
TGA-element	AACGAC	-161	-	Brassica oleracea	auxin-responsive element
TC-rich repeats	GTTTTCTTAC	-983	+	Nicotiana tabacum	cis-acting element involved in defense and stress responsiveness
CGTCA-motif	CGTCA	-1595	+	Hordeum vulgare	cis-acting regulatory element involved in the MeJA-responsiveness
MYB recognition site	CCGTTG	-613	-	Arabidopsis thaliana
ABRE	ACGTG	-1858	+	Arabidopsis thaliana	cis-acting element involved in the abscisic acid responsiveness
Unnamed__6	taTAAATATct	-873	+	Zea mays
ABRE3a	TACGTG	-1859	+	Zea mays
TCT-motif	TCTTAC	-979	+	Arabidopsis thaliana	part of a light responsive element
TCT-motif	TCTTAC	-834	+	Arabidopsis thaliana	part of a light responsive element
RY-element	CATGCATG	-853	-	Helianthus annuus	cis-acting regulatory element involved in seed-specific regulation
RY-element	CATGCATG	-849	-	Helianthus annuus	cis-acting regulatory element involved in seed-specific regulation
Box 4	ATTAAT	-1893	+	Petroselinum crispum	part of a conserved DNA module involved in light responsiveness
Box 4	ATTAAT	-1761	+	Petroselinum crispum	part of a conserved DNA module involved in light responsiveness
Box 4	ATTAAT	-1119	+	Petroselinum crispum	part of a conserved DNA module involved in light responsiveness
Box 4	ATTAAT	-793	-	Petroselinum crispum	part of a conserved DNA module involved in light responsiveness
Box 4	ATTAAT	-789	-	Petroselinum crispum	part of a conserved DNA module involved in light responsiveness
Box 4	ATTAAT	-189	-	Petroselinum crispum	part of a conserved DNA module involved in light responsiveness
Box 4	ATTAAT	-20	-	Petroselinum crispum	part of a conserved DNA module involved in light responsiveness
LTR	CCGAAA	-1973	+	Hordeum vulgare	cis-acting element involved in low-temperature responsiveness
CCAAT-box	CAACGG	-613	+	Hordeum vulgare	MYBHv1 binding site
G-box	TACGTG	-1859	+	Arabidopsis thaliana	cis-acting regulatory element involved in light responsiveness
ABRE4	CACGTA	-1859	-	Zea mays

## Sheet: Table S4
Table S4 Primers used in this study
Used for	Primers Name	Forward (5`-3`)	Reverse (5`-3`)
Gene isolation	CiMADS43-CDNA	ATGGGACGGGGAAAGATAGAG	TCACCCAAAGGTGGGGAAATG
	CiAGL9-CDNA	ATGGGAAGGGGTAGGGTTGAGTTGA	TTAGCATGGTAGCCATCCTTGCATG
Promoter isolation	CiMADS43-Promoter	AGCAACCCGCACTTCATTAGCC	TATTTATACCAACAATTAATTC
Overexpression vector	CiMADS43-GFP	GAGAGAACACGGGGGACTCTAGAATGGGACGGGGAAAGATAGAG	CGGGGATCCGCGGCCGCTCGAGCCCAAAGGTGGGGAAATG
	CiAGL9-GFP	GAGAGAACACGGGGGACTCTAGAATGGGAAGGGGTAGGGTT	CGGGGATCCGCGGCCGCTCGAGGCATGGTAGCCATCCTTG
CRISPR	BsaI-CiMADS43	CGATTCCCGGCTGGTGCAGTGACTTTTTCGAAACGCCGGTTTC	CCAGCATAGCTCTGAAACAGCAGTGTTCTTGAGCTTGCTGCAC
	CiMADS43-CR	CCACTTCTGATTACAGTCGTT	AATGATAATCTTGGCAGGAC
Y2H	BD-CiMADS43	TCAGAGGAGGACCTGCATATGATGGGACGGGGAAAGATAGAG	CTAGTTATGCGGCCGCTGCAGCCCAAAGGTGGGGAAATG
	BD-CiMADS43MIK	TCAGAGGAGGACCTGCATATGATGGGACGGGGAAAGATAGAG	CTAGTTATGCGGCCGCTGCAGTTGCTCATTCTCCTCCTCC
	BD-CiMADS43MI	TCAGAGGAGGACCTGCATATGATGGGACGGGGAAAGATAGAG	CTAGTTATGCGGCCGCTGCAGATTGTTAACGCCGGCTGGAAT
	BD-CiMADS43KC	TCAGAGGAGGACCTGCATATGCATGATTCGGAAGCAATTTAC	CTAGTTATGCGGCCGCTGCAGTCACCCAAAGGTGGGGAAATG
	BD-CiAGL9	GATCTCAGAGGAGGACCTGCATATGATGGGAAGGGGTAGGGTTGAG	CTAGTTATGCGGCCGCTGCAGTTAGCATGGTAGCCATCCTTGCATG
	AD-CiAGL9	CGACGTACCAGATTACGCTCATATGATGGGAAGGGGTAGGGTTGAGTTGA	CTACGATTCATCTGCAGCTCGAGTTAGCATGGTAGCCATCCTTGCATG
BiFC	CiMADS43-YN	CATTTAAATCTCGAGGGATCCATGGGACGGGGAAAGATAGAG	GATGGATCTTCTAGAGGATCCTTGCTCATTCTCCTCCTCCAAC
	CiAGL9-YC	GAGGAGGACCTGCTTTCTAGAATGGGAAGGGGTAGGGTTGAGTTGA	ACCGGATCCCTCGAGTCTAGAGCATGGTAGCCATCCTTGCATGTAA
qRT-PCR	qRT-CiMADS43	TTGAGTCTCCGACGCTACACC	ATTGTCTGTCTGCTGCCGTAA
	qRT-CiAGL9	TTGCCCACAAAGGGTATT	CTTGAAATCGCCATCCTCTA
	qRT-CiFT	ACTGATATTCCAGCAACCACA	GCATAAACAGTCTGCCTCCC
	qRT-CiLFY	GAACAGCTTGGGTCACTTGTTC	AGCATCAACAGCGTTGGTAGTA
	qRT-CiCLF	TCTGTTGCGAGTGGAGGTG	CATCAAATTGCGGCTGTCC
	qRT-CiSTM	CCGCAATAGCAGTAGTGGC	CGCTGCCATAGTTGGTCTC
	qRT-AtFT	GGTGGATCCAGATGTTCCAAGT	TTGCCAAAGGTTGTTCCAGTTG
	qRT-AtAP1	TGTGATGCTGAAGTTGCTCTTGTTG	CTCCATCGACCAGTTTGTATTGACG
	qRT-AtCLF	ATCAAGGCAAGACATGGAGT	TCATCTACAGGAGGACACCA
	qRT-AtSTM	CAACTGCTTGATTGGTGGAG	AAGGATTGCCCAAGACATTA
Pull-down	GST-CiMADS43	GTTCCAGGGGCCCCTGGGATCCATGGGACGGGGAAAGATAGAG	CGCTCGAGTCGACCCGGGAATTCTCACCCAAAGGTGGGGAAATG
	His-AGL9	GGCCATGGCTGATATCGGATCCATGGGAAGGGGTAGGGTTGAG	CTCGAGTGCGGCCGCAAGCTTTTAGCATGGTAGCCATCCTTG
Y1H	pAbAi-proCiMADS43	AGGTCGACGGTATCGATAAGCTTTATAAGATGATAATTCTGAC	GCCGCTCTAGAACTAGTGGATCCTTATATATAGGGCTTAGTCATC
Dual LUC assay	ProCiMADS43: LUC	AGGTCGACGGTATCGATAAGCTTAGTCACAGAAACTTGACACAC	GCCGCTCTAGAACTAGTGGATCCCTAATGTGTCCAGTGCTCACAC
	CiAGL9-62SK	GCCGCTCTAGAACTAGTGGATCCATGGGAAGGGGTAGGGTTGAG	GAGGTCGACGGTATCGATAAGCTTTTAGCATGGTAGCCATCCTTG
